# Supplementary material for: Bathymetry Derivatives and Habitat Data from Hyperspectral Imagery Establish a High-Resolution Baseline for Managing the Ningaloo Reef, Western Australia
Source: MDPI journal article supplement (doi:10.3390/rs14081827), 2022-04-10
Supplement: s1 [file s1]

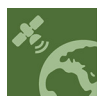

## Supplementary Materials

**Table S1.** Benthic cover types and their codes in field data of Ningaloo Reef [52].

| Name                                 | Code  |
|--------------------------------------|-------|
| Branching <i>Acropora</i>            | ACB   |
| Branching <i>Acropora</i> “blue tip” | ACBT  |
| Digitate <i>Acropora</i>             | ACD   |
| Encrusting <i>Acropora</i>           | ACE   |
| Submassive <i>Acropora</i>           | ACS   |
| Tabulate <i>Acropora</i>             | ACT   |
| Bottlebrush <i>Acropora</i>          | ACX   |
| Coralline Algae                      | CA    |
| Branching non- <i>Acropora</i>       | CB    |
| Digitate non- <i>Acropora</i>        | CD    |
| Encrusting non- <i>Acropora</i>      | CE    |
| Foliaceous non- <i>Acropora</i>      | CF    |
| Massive coral                        | CM    |
| Mushroom coral                       | CMR   |
| Submassive coral                     | CS    |
| Recently dead coral                  | DC    |
| <i>Dictyota</i>                      | DY    |
| <i>Halimeda</i> spp.                 | HA    |
| Intact Dead Coral                    | IDC   |
| Branching IDC                        | IDC-B |
| Tabulate IDC                         | IDC-T |
| Digitate IDC                         | IDC-D |
| Massive IDC                          | IDC-M |
| Limestone pavement                   | LP    |
| Macroalgae                           | MA    |
| <i>Padina</i>                        | PA    |
| Rubble                               | R     |
| Sand                                 | S     |
| Sand and Microalgae                  | SA    |
| Soft Coral                           | SC    |
| Seagrass                             | SG    |
| <i>Sargassum</i>                     | SR    |
| Sponge                               | Sp    |
| Turf Algae                           | TA    |
| <i>Ulva</i>                          | UL    |

**Table S2.** Definition of the ruleset and the class ranges using bathymetry data of Ningaloo Reef at the 9 × 9 pixel majority kernel scale. (Slope (degrees), aspect (0-360 degrees) and bathymetry (cm). Variable names are indicated in caps, Avg= average.

| Rule definition                                                                                           |
|-----------------------------------------------------------------------------------------------------------|
| 1 If Avg_SLOPE > 30.0 AND Avg_ASPECT [225.0, 315.0] AND Avg_DEPTH < -50.0, then assign to "W_steep_deep"  |
| 2 If Avg_SLOPE < 30.0 AND Avg_ASPECT [45.0, 135.0] AND Avg_DEPTH > -50.0, then assign to "E_flat_shallow" |
| 3 If Avg_ASPECT > 315.0 AND Avg_SLOPE < 30.0 AND Avg_DEPTH > -50.0, then assign to "N_flat_shallow"       |
| 4 If Avg_SLOPE < 30.0 AND Avg_DEPTH > -50.0 AND Avg_ASPECT [0.0, 45.0], then assign to "N_flat_shallow"   |

- 5 If Avg\_SLOPE > 30.0 AND Avg\_ASPECT [135.0, 225.0] AND Avg\_DEPTH < -50.0, then assign to "S\_steep\_deep"
- 6 If Avg\_SLOPE < 30.0 AND Avg\_ASPECT [225.0, 315.0] AND Avg\_DEPTH > -50.0, then assign to "W\_flat\_shallow"
- 7 If Avg\_SLOPE [30.0, 89.9598] AND Avg\_ASPECT [45.0, 135.0] AND Avg\_DEPTH < -50.0, then assign to "E\_steep\_deep"
- 8 If Avg\_SLOPE [30.0, 89.9598] AND Avg\_ASPECT > 315.0 AND Avg\_DEPTH < -50.0, then assign to "N\_steep\_deep"
- 9 If Avg\_SLOPE [30.0, 89.9598] AND Avg\_ASPECT [0.0, 45.0] AND Avg\_DEPTH < -50.0, then assign to "N\_steep\_deep"
- 10 If Avg\_SLOPE < 30.0 AND Avg\_ASPECT [135.0, 225.0] AND Avg\_DEPTH > -50.0, then assign to "S\_flat\_shallow"
- 11 If Avg\_SLOPE > 30.0 AND Avg\_ASPECT [225.0, 315.0] AND Avg\_DEPTH > -50.0, then assign to "W\_steep\_shallow"
- 12 If Avg\_SLOPE < 30.0 AND Avg\_ASPECT [225.0, 315.0] AND Avg\_DEPTH < -50.0, then assign to "W\_flat\_deep"
- 13 If Avg\_SLOPE > 30.0 AND Avg\_ASPECT [45.0, 135.0] AND Avg\_DEPTH > -50.0, then assign to "E\_steep\_shallow"
- 14 If Avg\_SLOPE < 30.0 AND Avg\_ASPECT [45.0, 135.0] AND Avg\_DEPTH < -50.0, then assign to "E\_flat\_deep"
- 15 If Avg\_SLOPE > 30.0 AND Avg\_ASPECT > 315.0 AND Avg\_DEPTH > -50.0, then assign to "N\_steep\_shallow"
- 16 If Avg\_SLOPE > 30.0 AND Avg\_ASPECT [0.0, 45.0] AND Avg\_DEPTH > -50.0, then assign to "N\_steep\_shallow"
- 17 If Avg\_SLOPE < 30.0 AND Avg\_ASPECT > 315.0 AND Avg\_DEPTH < -50.0, then assign to "N\_flat\_deep"
- 18 If Avg\_SLOPE < 30.0 AND Avg\_ASPECT [0.0, 45.0] AND Avg\_DEPTH < -50.0, then assign to "N\_flat\_deep"
- 19 If Avg\_SLOPE > 30.0 AND Avg\_ASPECT [135.0, 225.0] AND Avg\_DEPTH > -50.0, then assign to "S\_steep\_shallow"
- 20 If Avg\_SLOPE < 30.0 AND Avg\_ASPECT [135.0, 225.0] AND Avg\_DEPTH < -50.0, then assign to "S\_flat\_deep"
- 21 If Avg\_ASPECT < 0.0 AND Avg\_DEPTH [-50.0, -1.0], then assign to "Noaspect\_flat\_shallow"
- 22 If Avg\_ASPECT < 0.0 AND Avg\_DEPTH < -50.0, then assign to "Noaspect\_flat\_deep"

**Table S3.** The ruleset for geomorphic classes developed using topographic and habitat classes for the Ningaloo Reef. Area = the object area; tx\_variance = the texture variance of the object; tx\_entropy = the object's entropy; max, min, std prefixes indicate minimum, maximum and standard deviation of slope and depth. Other parameters specified below are related to the object shape, such as length, area, convexity and the length of the major and minor axes. Thresholds for the area are in m<sup>2</sup> and depth in cm.

| Class name                          | Details of the ruleset                                                                                                                                                                                                                              |
|-------------------------------------|-----------------------------------------------------------------------------------------------------------------------------------------------------------------------------------------------------------------------------------------------------|
| Sand (flat, lagoonal)               | Area > 8000.0 AND tx_variance < 9.0 AND tx_entropy > 0.1858 AND maxslope < 40.0 AND mindepth > -100.0 AND avgBenthic_Class [20.0, 29.0] AND stdBenthicClass < 10.0 AND stdslope < 10.0                                                              |
| Sand (lagoonal slopes)              | If area [600.0, 1500.0] AND length [20.0, 1000.0] AND convexity < 1.2 AND roundness < 0.5483 AND majaxislen > 54.7999 AND minaxislen < 40.0 AND tx_range < 15.6671 AND avgSLOE_1 > 15.0 AND avgBenthicClass [29.0, 29.0] OR avgband_4 [19.0, 19.0]. |
| Sand (lagoonal slopes)              | Elongation > 4.0 AND majaxislen > 100.0 AND minaxislen < 38.0000                                                                                                                                                                                    |
| Forereef and deep lagoonal          | maxdepth < -55.0                                                                                                                                                                                                                                    |
| Backreef and shallow lagoonal       | maxdepth [-70.0, -10.0] AND mindepth [-150.0, -20.0] AND avgBenthicClass NOT [28.5, 29.5] AND area > 50.0                                                                                                                                           |
| Reef flat and very shallow lagoonal | maxdepth > -20.0 AND mindepth > -50.0 AND avgBenthicClass NOT [28.5, 29.5] AND tx_range NOT [8.1237, 12.7657]                                                                                                                                       |

**Table S4.** Results of the validation of the pixel-based classification against the field data.

| Classification labels*                   | HC | HC and MA with LP | HC with LP | HC with S | HC with TA- or MA- | HC with TA- or MA- | HC, MA and TA | LP dark | LP light | LP with S | LP, R and S | MA | MA with LP | MA with LP and S | MA with R | MA with S | S | SC | SC, HC and MA with | SC, HC with LP | TA with LP | Total | Producer's accuracy |
|------------------------------------------|----|-------------------|------------|-----------|--------------------|--------------------|---------------|---------|----------|-----------|-------------|----|------------|------------------|-----------|-----------|---|----|--------------------|----------------|------------|-------|---------------------|
| HC                                       | 10 | 1                 | 1          | 0         | 0                  | 0                  | 1             | 0       | 0        | 0         | 0           | 0  | 0          | 0                | 0         | 0         | 0 | 0  | 0                  | 0              | 0          | 12    | 80.6                |
| HC and MA with LP and S                  | 1  | 9                 | 1          | 1         | 0                  | 0                  | 0             | 0       | 0        | 0         | 0           | 0  | 0          | 0                | 0         | 0         | 0 | 0  | 0                  | 0              | 0          | 12    | 76.6                |
| HC with LP                               | 1  | 1                 | 7          | 0         | 0                  | 0                  | 1             | 0       | 0        | 0         | 0           | 0  | 0          | 0                | 0         | 0         | 0 | 0  | 0                  | 0              | 0          | 10    | 73.7                |
| HC with S                                | 1  | 1                 | 1          | 6         | 0                  | 0                  | 0             | 0       | 0        | 0         | 0           | 0  | 0          | 0                | 0         | 0         | 0 | 0  | 0                  | 0              | 0          | 9     | 64.7                |
| HC with TA- or MA-covered IDC or R       | 1  | 0                 | 0          | 0         | 5                  | 0                  | 1             | 0       | 0        | 0         | 0           | 0  | 0          | 0                | 0         | 0         | 0 | 0  | 0                  | 0              | 0          | 8     | 67.7                |
| HC with TA- or MA-covered IDC or R and S | 1  | 0                 | 0          | 0         | 0                  | 2                  | 1             | 0       | 0        | 0         | 0           | 0  | 0          | 0                | 0         | 0         | 0 | 0  | 0                  | 0              | 0          | 4     | 50.0                |
| HC, MA and TA with LP                    | 0  | 0                 | 1          | 0         | 0                  | 0                  | 7             | 0       | 0        | 0         | 0           | 0  | 0          | 0                | 0         | 0         | 0 | 0  | 0                  | 0              | 0          | 9     | 79.4                |
| LP dark                                  | 0  | 0                 | 0          | 0         | 0                  | 0                  | 1             | 5       | 0        | 1         | 1           | 0  | 0          | 0                | 0         | 0         | 0 | 0  | 0                  | 0              | 0          | 7     | 77.8                |
| LP light                                 | 0  | 0                 | 0          | 0         | 0                  | 0                  | 0             | 1       | 5        | 2         | 0           | 0  | 0          | 0                | 0         | 0         | 0 | 0  | 0                  | 0              | 0          | 7     | 64.3                |
| LP with S                                | 0  | 0                 | 0          | 0         | 0                  | 0                  | 0             | 1       | 1        | 10        | 0           | 0  | 0          | 0                | 0         | 0         | 1 | 0  | 0                  | 0              | 0          | 12    | 81.6                |
| LP, R and S                              | 0  | 0                 | 0          | 0         | 0                  | 0                  | 0             | 0       | 0        | 1         | 5           | 0  | 0          | 0                | 0         | 0         | 1 | 0  | 0                  | 0              | 0          | 6     | 72.0                |
| MA                                       | 0  | 0                 | 0          | 0         | 0                  | 0                  | 0             | 0       | 0        | 0         | 0           | 10 | 0          | 0                | 0         | 1         | 0 | 0  | 0                  | 0              | 0          | 11    | 93.2                |
| MA with LP                               | 0  | 0                 | 0          | 0         | 0                  | 0                  | 0             | 1       | 0        | 0         | 0           | 1  | 7          | 1                | 0         | 1         | 0 | 0  | 0                  | 0              | 0          | 12    | 63.1                |
| MA with LP and S                         | 0  | 0                 | 0          | 0         | 0                  | 0                  | 0             | 0       | 1        | 0         | 0           | 1  | 1          | 7                | 1         | 1         | 0 | 0  | 0                  | 0              | 0          | 11    | 60.0                |
| MA with R                                | 0  | 0                 | 0          | 0         | 0                  | 0                  | 0             | 0       | 0        | 0         | 0           | 2  | 0          | 1                | 5         | 1         | 0 | 0  | 0                  | 0              | 0          | 9     | 58.3                |

|                              |           |           |           |          |          |          |           |          |          |           |          |           |           |           |          |          |           |          |          |          |          |            |      |
|------------------------------|-----------|-----------|-----------|----------|----------|----------|-----------|----------|----------|-----------|----------|-----------|-----------|-----------|----------|----------|-----------|----------|----------|----------|----------|------------|------|
| MA with S                    | 0         | 0         | 0         | 0        | 0        | 0        | 0         | 0        | 1        | 0         | 0        | 1         | 1         | 1         | 0        | 6        | 0         | 0        | 0        | 0        | 1        | 10         | 63.2 |
| S                            | 0         | 0         | 0         | 0        | 0        | 0        | 0         | 0        | 0        | 0         | 1        | 0         | 0         | 0         | 0        | 0        | 12        | 0        | 0        | 0        | 0        | 13         | 90.4 |
| SC                           | 0         | 0         | 0         | 0        | 0        | 0        | 0         | 0        | 0        | 0         | 0        | 0         | 0         | 0         | 0        | 0        | 0         | 5        | 2        | 2        | 0        | 9          | 58.3 |
| SC, HC and MA<br>with LP     | 0         | 0         | 0         | 0        | 0        | 0        | 1         | 0        | 0        | 0         | 0        | 0         | 0         | 0         | 0        | 0        | 0         | 1        | 4        | 1        | 0        | 7          | 57.7 |
| SC, HC with LP               | 1         | 0         | 0         | 0        | 0        | 0        | 0         | 0        | 0        | 0         | 0        | 0         | 0         | 0         | 0        | 0        | 0         | 1        | 1        | 4        | 0        | 7          | 55.6 |
| TA with LP                   | 0         | 0         | 0         | 0        | 0        | 0        | 0         | 0        | 0        | 0         | 0        | 1         | 1         | 0         | 0        | 0        | 0         | 0        | 0        | 0        | 2        | 4          | 64.3 |
| <b>Total</b>                 | <b>14</b> | <b>12</b> | <b>11</b> | <b>7</b> | <b>7</b> | <b>3</b> | <b>11</b> | <b>7</b> | <b>7</b> | <b>13</b> | <b>7</b> | <b>15</b> | <b>10</b> | <b>10</b> | <b>7</b> | <b>9</b> | <b>13</b> | <b>8</b> | <b>6</b> | <b>7</b> | <b>3</b> | <b>185</b> |      |
| <b>User's accuracy (%)</b>   | 69.1      | 78.3      | 66.7      | 78.6     | 77.8     | 66.7     | 61.4      | 72.4     | 64.3     | 75.5      | 66.7     | 68.3      | 74.4      | 65.9      | 77.8     | 66.7     | 90.4      | 67.8     | 60.0     | 57.7     | 75.0     |            |      |
| <b>Overall agreement (%)</b> | 71.08     |           |           |          |          |          |           |          |          |           |          |           |           |           |          |          |           |          |          |          |          |            |      |

\*Abbreviations used: HC hard coral, MA macro algae, LP limestone pavement, S sand, IDC intact dead coral, R rubble (coral rubble), SC soft coral, TA turfing algae

**Table S5** Results of the validation of the geomorphic classification against field data.

| Validation of the geomorphic classification                                                       | Geomorphic class name                     |                               |                                       |                                           |                                             |             |  |                         |
|---------------------------------------------------------------------------------------------------|-------------------------------------------|-------------------------------|---------------------------------------|-------------------------------------------|---------------------------------------------|-------------|--|-------------------------|
|                                                                                                   | Coral and algal back and shallow forereef | Coral and algal deep forereef | Coral and algal reef flat and shallow | Sand and limestone pavement flat lagoonal | Sand and limestone pavement lagoonal slopes | Grand Total |  | Producer's accuracy (%) |
| Field validation                                                                                  |                                           |                               |                                       |                                           |                                             |             |  |                         |
| Hard coral                                                                                        | 5                                         |                               |                                       |                                           |                                             | 5           |  | 100.0                   |
| Hard coral with limestone pavement                                                                |                                           |                               | 2                                     |                                           |                                             | 2           |  | 100.0                   |
| Hard coral with macro algae                                                                       | 22                                        | 6                             | 6                                     | 1                                         |                                             | 35          |  | 97.1                    |
| Hard coral with macro algae and limestone pavement                                                | 17                                        | 10                            | 9                                     |                                           |                                             | 36          |  | 100.0                   |
| Limestone pavement                                                                                |                                           |                               |                                       |                                           | 1                                           | 1           |  | 100.0                   |
| Limestone pavement with sand                                                                      | 1                                         | 1                             | 1                                     | 4                                         | 3                                           | 10          |  | 70.0                    |
| Macro algae                                                                                       | 1                                         |                               | 2                                     |                                           |                                             | 3           |  | 100.0                   |
| Macro algae and limestone pavement                                                                |                                           | 1                             | 1                                     |                                           |                                             | 2           |  | 100.0                   |
| Macro algae with limestone pavement and sand                                                      | 1                                         |                               |                                       |                                           |                                             | 1           |  | 100.0                   |
| Sand                                                                                              |                                           |                               |                                       | 12                                        | 1                                           | 13          |  | 92.3                    |
| Sand and limestone pavement                                                                       |                                           |                               |                                       |                                           | 1                                           | 1           |  | 100.0                   |
| Sand                                                                                              |                                           |                               |                                       | 2                                         |                                             | 2           |  | 100.0                   |
| Soft coral, hard coral and limestone pavement                                                     |                                           |                               | 1                                     | 1                                         |                                             | 2           |  | 50.0                    |
| Soft coral, hard coral, macro algae and limestone pavement                                        | 5                                         | 3                             |                                       |                                           |                                             | 8           |  | 100.0                   |
| Soft coral, hard coral and macro algae                                                            | 2                                         |                               | 1                                     |                                           |                                             | 3           |  | 100.0                   |
| Grand Total                                                                                       | 54                                        | 21                            | 23                                    | 20                                        | 6                                           | 124         |  |                         |
| user's accuracy                                                                                   | 96.3                                      | 90.5                          | 91.3                                  | 90.0                                      | 100.0                                       |             |  |                         |
| Overall accuracy= 93.5%                                                                           |                                           |                               |                                       |                                           |                                             |             |  |                         |
| Green shading indicates classes belonging to the coral dominated geomorphic classes               |                                           |                               |                                       |                                           |                                             |             |  |                         |
| Yellow shading indicates classes belonging to the sand and limestone dominated geomorphic classes |                                           |                               |                                       |                                           |                                             |             |  |                         |

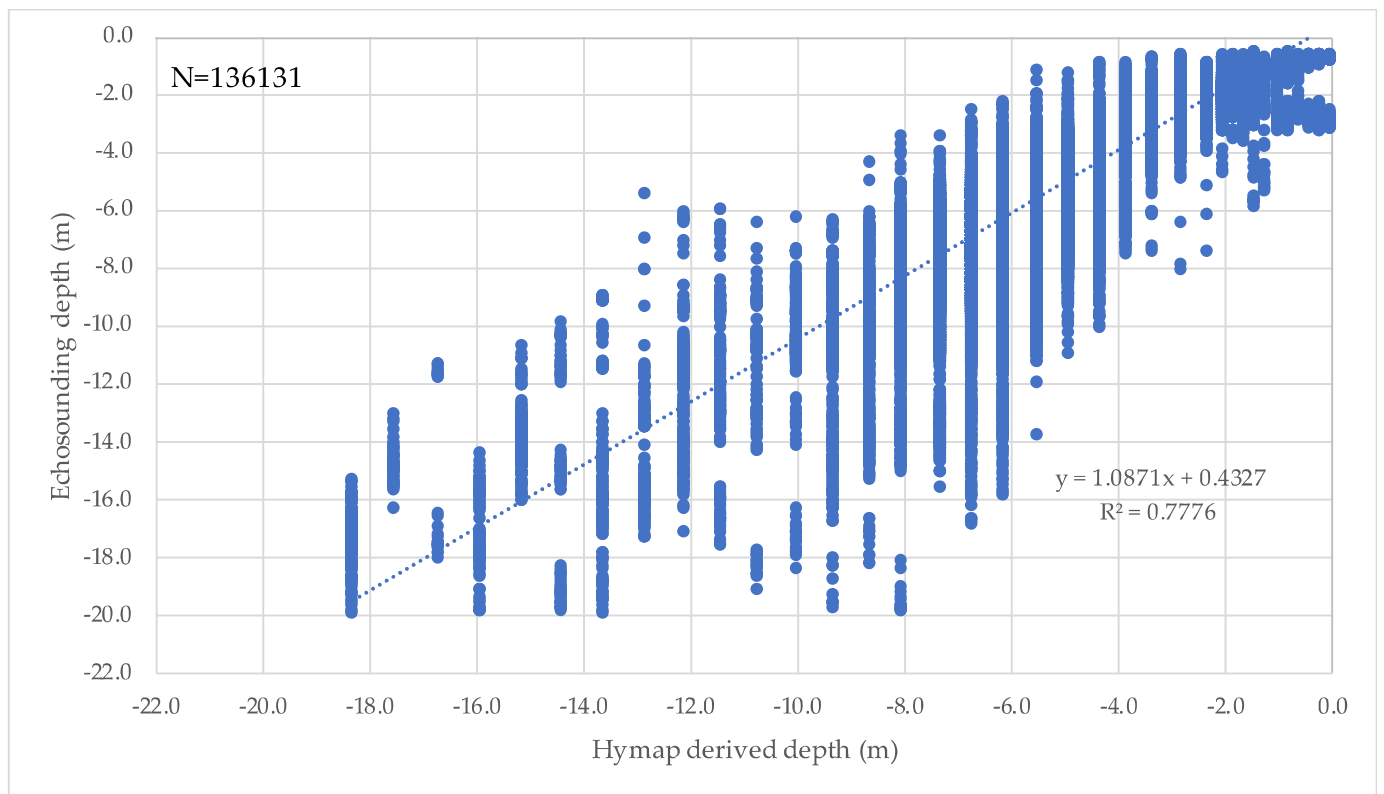

**Figure S1.** Validation of the bathymetry data derived from the HyMap sensor against echosounder data (WA Dept of Transport).
